# Supplementary material for: Lipid Status of A2780 Ovarian Cancer Cells after Treatment with Ruthenium Complex Modified with Carbon Dot Nanocarriers: A Multimodal SR-FTIR Spectroscopy and MALDI TOF Mass Spectrometry Study
Source: MDPI journal article supplement (doi:10.3390/cancers14051182), 2022-02-24
Supplement: s1 [file s1]

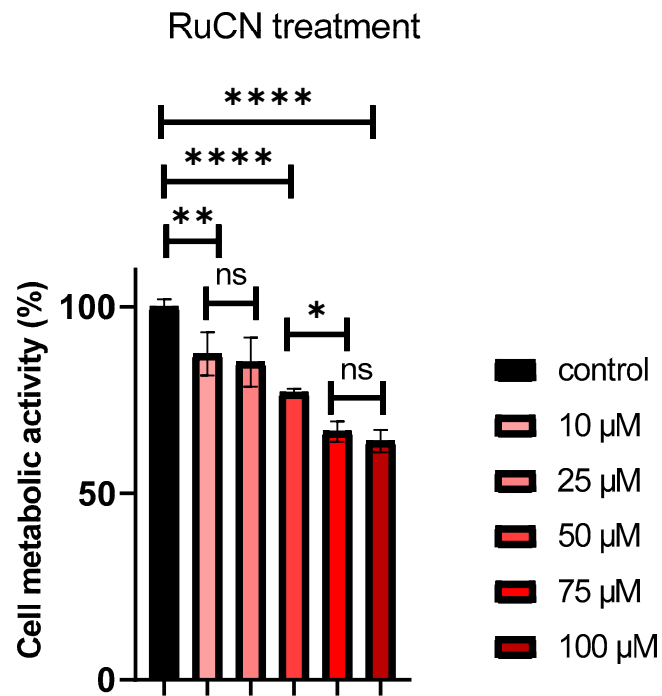

Figure S1. Cell metabolic activity after the indicated treatment condition with RuCN expressed as a percentage of the non-treated control (the mean  $\pm$  SD). Statistical significance was determined using the ANOVA test. ns (not significant,  $p > 0.05$ ) and significant \* ( $p < 0.05$ ), \*\* ( $p < 0.01$ ), \*\*\*\* ( $p < 0.0001$ ).

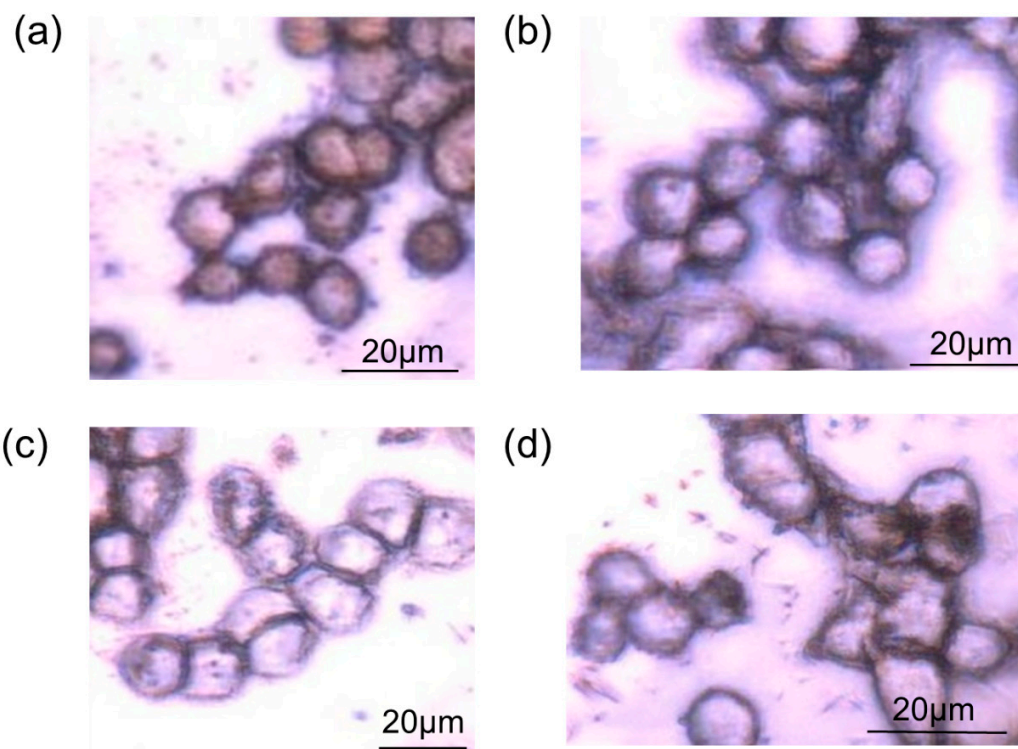

Figure S2. Visible microscopy of (a) untreated A2780 cells (control), (b) A2780 cells treated with RuCN/N-CDs, (c) A2780 cells treated with RuCN/CDs, and (d) A2780 cells treated with RuCN
